1 **Title: Task errors drive memories that improve sensorimotor adaptation.**

2 Li-Ann Leow<sup>1\*</sup>, Welber Marinovic<sup>2</sup>, Aymar de Rugy<sup>3</sup>, Timothy J Carroll<sup>1</sup>

3 <sup>1</sup> Centre for Sensorimotor Performance, School of Human Movement and Nutrition  
4 Sciences, Building 26B, The University of Queensland, Brisbane QLD 4072, Australia.

5 <sup>2</sup> School of Psychology, Curtin University, Building 401

6 Kent Street Bentley WA 6102, WA, Australia.

7 <sup>3</sup> Institut de Neurosciences Cognitives et Intégratives d'Aquitaine, CNRS UMR 5287,  
8 Université de Bordeaux, France.

9 \*Corresponding author: Li-Ann Leow. Corresponding author email: [l.leow@uq.edu.au](mailto:l.leow@uq.edu.au)

10

11 **Abstract**

12 Traditional views of sensorimotor adaptation, or adaptation of movements to  
13 perturbed sensory feedback, emphasize the role of automatic, implicit correction of  
14 sensory prediction errors (differences between predicted and actual sensory  
15 outcomes). However, latent memories formed from sensorimotor adaptation,  
16 prominently evidenced in improved learning (i.e., savings), have recently been  
17 attributed to strategic corrections of task errors (failures to achieve task goals). To  
18 dissociate contributions of task errors and sensory prediction errors to latent  
19 sensorimotor memories, we perturbed target locations to remove or enforce task  
20 errors during learning and/or test. We show that prior learning to correct task errors  
21 was sufficient for savings: a history of sensory prediction errors was neither sufficient  
22 nor obligatory for savings. Limiting movement preparation time further revealed two  
23 distinct components of this learning: 1) time-consuming, flexible strategies, and 2)  
24 rapidly expressible, inflexible stimulus-response associations. The results show that  
25 adaptive responses to sensorimotor perturbations take many forms.

26 **Introduction**

27 A large body of knowledge created in the last 25 years about motor learning  
28 has been drawn from the paradigm of sensorimotor adaptation. Here, a systematic  
29 perturbation is applied to the visual representation of movement (Cunningham, 1989;  
30 von Helmholtz et al., 1924), or to limb dynamics (Dietz et al., 1994; Shadmehr et al.,  
31 1994), such that the sensory consequences of motor commands are changed. This  
32 necessitates adaptive motor responses in order to restore effective movement under  
33 the new conditions. Given changes in the environment and the body, such adaptive  
34 processes are essential to sustain successful movement in the natural world. There  
35 are, however, long standing questions over the extent to which principles of  
36 sensorimotor adaptation apply to other forms of motor learning; especially to the

37 acquisition of novel motor skills. This issue is important because novel skill  
38 acquisition is of considerable practical relevance: during rehabilitation (Krakauer et  
39 al., 2017), sport (e.g., learning to serve a tennis ball), and industry (e.g., learning to  
40 control a back-hoe).

41 A key piece of evidence pertinent to the question of how sensorimotor  
42 adaptation relates to other forms of motor learning is the extent to which exposure to  
43 sensorimotor perturbations generates long-lasting memories. Sensorimotor memory  
44 is often operationalised as improved adaptation when re-encountering a similar  
45 perturbation, and the phenomenon, commonly termed savings, is well documented  
46 (Brashers-Krug et al., 1996; Cassady et al., 2018; Day et al., 2018; Flook et al.,  
47 1977; Kojima et al., 2004; Mawase et al., 2014; Roemmich et al., 2015; Seidler et al.,  
48 2017). Importantly, the sensorimotor memories implied by savings are latent,  
49 because the benefit of previous exposure persists even after behaviour is returned to  
50 the naïve state by removing the perturbation for many trials (Zarahn et al., 2008),  
51 even a year after the initial encounter (Landi et al., 2011; Maeda et al., 2018). A  
52 latent form of memory for sensorimotor perturbations is both obligatory for success  
53 given the non-stationarity of our environment, and reminiscent of new motor skill  
54 memories, which can be flexibly expressed according to context.

55 Although a long history of work has sought to identify the mechanisms that  
56 underlie savings (e.g., Hadjiosif et al., 2013; Herzfeld et al., 2014; Huang et al.,  
57 2011; Huberdeau et al., 2015a; Mawase et al., 2014; Orban de Xivry et al., 2015;  
58 Smith et al., 2006), the topic remains controversial. One influential proposal was the  
59 idea that savings occurs because specific actions are associated with task success  
60 during initial adaptation to the perturbation, and that these actions are recalled upon  
61 task failure when a related perturbation is subsequently encountered (Huang et al.,  
62 2011). An alternative idea is that exposure to a new sensorimotor environment  
63 induces a form of “meta-learning”, in which the structure of the perturbation is  
64 encoded in memory to assist subsequent adaptation (Braun et al., 2009). More  
65 recently, savings was attributed to changes in the sensitivity to errors (Gonzalez  
66 Castro et al., 2014; Herzfeld et al., 2014). According to this idea, experiencing a  
67 systematic sequence of errors generates a memory of errors, which increases  
68 sensitivity to those errors and the gain of error correction when reencountering  
69 similar errors (Gonzalez Castro et al., 2014; Herzfeld et al., 2014).

70 Despite the importance of the phenomenon of savings for the broad field of

71 motor learning, interest in the processes that underlie the effect has declined since  
72 the emergence of compelling evidence that savings in standard visuomotor rotation  
73 tasks is dominated by volitional, strategic selection of actions that restore task  
74 success (Avraham et al., 2019; de Brouwer et al., 2017; Haith et al., 2015; Morehead  
75 et al., 2015). For example, if leftward displacement of visual feedback causes a  
76 person to miss the target to the left, they tend to deliberately aim to the right of the  
77 target to counteract the error (Uhlarik, 1973). Using cues to signal perturbation onset  
78 prompted rapid re-selection of the adapted movement on the first trial, even before  
79 participants re-experienced the previously encountered error (Morehead et al.,  
80 2015). Similarly, suppressing strategy use by limiting movement preparation time  
81 prevented the expression of savings (Haith et al., 2015). If savings were solely a  
82 manifestation of deliberate strategy use, then “cognitive” functions which determine  
83 how successfully one might acquire and implement strategies would be central to  
84 acquisition of latent sensorimotor memories: non-strategic “motor” processes would  
85 thus be of less importance.

86 But is the conscious awareness of a strategy, to apply a corrective movement  
87 that already exists within the participant’s motor repertoire, really all that is retained  
88 when a person adapts movement to a perturbation? Or are there components of  
89 savings that are less amenable to conscious control? Savings is evident in  
90 alternative sensorimotor adaptation contexts where the required corrective  
91 movement is less obvious, such as force field and split-belt treadmill paradigms  
92 (Cassady et al., 2018; Day et al., 2018; Mawase et al., 2014; Roemmich & Bastian,  
93 2015) or in saccadic adaptation (Kojima et al., 2004). This suggests the existence of  
94 a component to long-term retention of latent sensorimotor memories that is less  
95 accessible to conscious awareness. If there are indeed multiple components to long-  
96 term sensorimotor memories, then what are the necessary conditions for their  
97 encoding and expression? A systematic approach to address this question requires  
98 experiments to dissociate the contributions of the different types of errors that drive  
99 sensorimotor adaptation, both during the initial exposure to the perturbation and  
100 when the putative latent learning is subsequently expressed. Sensorimotor  
101 perturbations, by definition, evoke sensory prediction errors (i.e., discrepancies  
102 between predicted sensory outcomes of movements and actual sensory outcomes of  
103 movements), but can also lead to task errors (i.e., a failure to successfully  
104 accomplish a task, such as missing a target). These errors have dissociable neural

105 correlates (Diedrichsen et al., 2005; Palidis et al., 2018; Reuter et al., 2018;  
106 Torrecillos et al., 2014) and dissociable behavioural consequences (Izawa et al.,  
107 2011; Nikooyan et al., 2015; Therrien et al., 2016). Which of these errors are  
108 required for the encoding and expression of long-term sensorimotor memories?

109 Here, we show that correcting for task errors during an initial exposure to  
110 visuomotor rotation is necessary for latent retention of visuomotor memory, and that  
111 it is not necessary to reexperience task errors in order to subsequently express this  
112 learning. Further, we show that a history of correcting for task errors, provoked by  
113 perturbing target location rather than sensory feedback of movement, can evoke  
114 faster adaptation to a subsequent sensorimotor perturbation, even when participants  
115 have no prior experience of this sensorimotor perturbation. This learning appeared at  
116 first glance to show hallmarks of a volitionally controlled strategy: it was flexible  
117 enough to accommodate a different reach solution at training and at test. However,  
118 flexibility disappeared when we limited movement preparation time: performance  
119 was worse than naïve as participants continued to re-engage the now-maladaptive  
120 reach solution that they had learned previously to associate with restoration of  
121 success in the task. Thus, improved adaptation to sensorimotor perturbation requires  
122 a history of compensating for task errors, and the latent sensorimotor memories that  
123 underlie improved adaptation to subsequent perturbations can take at least two  
124 distinct forms, 1) volitionally controlled, flexible strategies and 2) inflexible stimulus-  
125 response associations that are less amenable to volitional control.

## 126 **Methods and Materials**

### 127 **Participants**

128 There were a total of 132 participants (75 female, age range 17-34 years,  
129 mean age 20.6). All participants were naïve to visuomotor rotation and force-field  
130 adaptation tasks, and were naïve to the aims of the study. Participants received  
131 course credit or monetary reimbursement upon study completion. The study was  
132 approved by the Human Research Ethics Committee at The University of  
133 Queensland. All participants provided written informed consent. This study conforms  
134 with the Declaration of Helsinki.

### 135 **Apparatus**

136 Participants completed the task using a vBOT planar robotic manipulandum,  
137 which has a low-mass, two-link carbon fibre arm and measures position with optical

138 encoders sampled at 1,000 Hz (Howard et al., 2009). Participants were seated on a  
139 height-adjustable chair at their ideal height for viewing the screen for the duration of  
140 the experiment. Visual feedback was presented on a horizontal plane on a 27" LCD  
141 computer monitor (ASUS, VG278H, set at 60Hz refresh rate) mounted above the  
142 vBOT and projected to the participant via a mirror in a darkened room, preventing  
143 direct vision of her/his hand. The mirror allowed the visual feedback of the targets,  
144 the start circle, and hand cursor to be presented in the plane of movement, with a  
145 black background. The start was aligned approximately 10cm to the right of the  
146 participant's mid-sagittal plane at approximately mid-sternum level. An air-sled was  
147 used to support the weight of participants' right forearms, to reduce possible effects  
148 of fatigue.

### 149 **General Trial Structure**

150 While grasping the robot arm, participants moved their hand-cursor (0.5cm  
151 radius red circle) from the central start circle (0.5cm radius white circle) to the targets  
152 (0.5cm radius yellow circles). Targets appeared in random order at one of eight  
153 locations ( $0^\circ$ ,  $45^\circ$  ....  $315^\circ$ ) at a radius of 9 cm from a central start circle. At the start  
154 of each trial, the central start circle was displayed. If participants failed to move their  
155 hand-cursor to within 1cm of the start circle after 1 second, the robotic  
156 manipulandum moved the participant's hand to the start circle (using a simulated 2  
157 dimensional spring with the spring constant magnitude increasing linearly over time).  
158 A trial was initiated when the cursor remained within the home location at a speed  
159 below 0.1cm/s for 200ms. Across all experiments, we used a classical timed-  
160 response paradigm (e.g., e.g., Schouten et al., 1967) to manipulate movement  
161 preparation time during the planar reaching task (Favilla et al., 1996). A sequence of  
162 three tones, spaced 500ms apart, was presented at a clearly audible volume via  
163 external speakers. Participants were instructed to time the onset of their movements  
164 with the onset of the third tone, which was more highly-pitched than the two  
165 previous, and slice through the target with their cursor. Movement initiation time was  
166 identified online as when hand speed exceeded 2cm/s. Targets appeared at 1000ms  
167 minus a monitor display latency ( $27.6 \pm 1.8$ ms), before the third tone. Thus, target  
168 direction information became available 972ms before the desired initiation time.  
169 When movements were initiated 50ms later than the third tone, the trial was aborted:  
170 the screen went black and the text "Too Late" was displayed on the feedback screen.

171 When movements were initiated more than 100ms before the desired initiation time,  
172 the trial was aborted: the screen went black and a “Too Soon” error message was  
173 displayed. Thus, movements had to be initiated between 872 and 1022ms of target  
174 presentation. We chose this movement preparation time for consistency with our  
175 previous work using the timed-response paradigm with visuomotor rotations (Leow et  
176 al., 2017). No visual feedback about movements was available when trials were  
177 aborted, and so such trials were repeated at the end of the cycle. We enforced long  
178 movement preparation times across most conditions to prevent the possibility that  
179 the task error manipulation resulted in self-selection of different movement  
180 preparation times. Under these conditions, participants had ample opportunity (i.e.  
181 time for movement preparation) to use explicit strategies.

182         Across all conditions, cursor feedback was displayed after the hand had  
183 moved 4cm from the start to target (located 9cm away from the start). At this point,  
184 the direction of cursor velocity was measured to define target movements in some  
185 conditions as described below. During **StandardTaskError** conditions, the target  
186 remained stationary throughout the trial, such that whether or not participants hit the  
187 target was contingent on the participant’s reach direction. During **NoTaskError**  
188 conditions, the target was shifted to align with the direction of cursor velocity,  
189 measured at 4cm into the movement. This is analogous to moving a basketball hoop  
190 towards the ball mid-flight; the ball always goes through the hoop regardless of the  
191 person’s actions. During **EnforcedTaskError** conditions, the target was shifted  
192 randomly by 20°–30° (counterclockwise in half of the trials, clockwise in half of the  
193 trials) relative to the cursor direction when the hand  
194 had moved 4 cm from the start. This is analogous to moving a basketball hoop away  
195 from the ball’s trajectory; participants can never get the ball through the hoop  
196 regardless of where they shoot. In Experiments 3 and 4, we imposed systematic task  
197 errors without any perturbation of the hand-cursor relationship: the target was moved  
198 during the movement by 30° relative to the original target position, always in the  
199 same direction (clockwise for half of all participants, counterclockwise of half of all  
200 participants, counterbalanced): no rotation of the visual feedback of movement was  
201 imposed when this occurred.

202         To familiarize participants with the equipment and the timed-response  
203 paradigm, all participants were first allowed a familiarization block comprising a  
204 maximum of 6 cycles. One cycle consisted of 1 trial to each of the 8 targets, and

205 target order was random within each cycle. Participants were explicitly instructed to  
206 make shooting movements so that the cursor passed through the targets, rather than  
207 to stop on the targets. Cursor feedback terminated as soon as the desired movement  
208 extent (the 9cm distance between the start and the target) was achieved. After  
209 familiarisation, all participants (regardless of assigned condition) were given the  
210 same task instruction, as follows. “Your task in this experiment is to hit the targets.  
211 The computer might disturb the cursor and/or the target, this is a normal part of the  
212 experiment, just try to hit the target as well as you can”. Participants then completed  
213 the following blocks. **Baseline** (6 cycles): no rotation of visual feedback. **Training**  
214 (60 cycles): For experiments 1 & 2, a 30° rotation of cursor feedback representing  
215 the hand position was imposed. Half of all participants encountered a clockwise 30°  
216 rotation and half encountered a 30° counterclockwise rotation. For experiments 3-4,  
217 no cursor rotation was applied during this training phase, but a 30° rotation of target  
218 position relative to the original target position was applied mid-movement. Half of all  
219 participants encountered a clockwise 30° rotation and half encountered a 30°  
220 counterclockwise rotation. **No feedback** (6 cycles): Upon leaving the start circle, no  
221 feedback about movements was available. Before this block, participants received  
222 explicit instructions about the rotation removal, as follows: “Any disturbance that the  
223 computer has applied is now gone, and the feedback of your movement will now be  
224 hidden as soon as it leaves the start circle, so please move straight to the target”.

225 **Washout:** Cursor position feedback was restored, but the 30° rotation of cursor was  
226 removed. For Experiments 1 and 2, to prevent the experience of washout-related  
227 task errors, task errors were removed across all conditions (i.e., the target position  
228 shifted mid-movement to ensure that the cursor always hit the target). The length of  
229 the washout block was the same as the adaptation block (60 cycles). For  
230 Experiments 3 and 4, participants had no prior experience of the cursor rotation, only  
231 task errors, and they could volitionally reach straight to the target by the end of the  
232 no-feedback block, thus it was unnecessary to employ a long washout with the no-  
233 task-error manipulation to avoid exposure to errors related to abrupt removal of the  
234 perturbation: we thus provided 12 washout cycles without mid-movement target  
235 shifts. **Test** (60 cycles): the 30° rotation of cursor feedback was imposed (half of all  
236 participants encountered a clockwise 30° rotation and half encountered a 30°  
237 counterclockwise rotation). Between each block, there was a small delay to allow for  
238 experimental instructions and loading of the computer code for different experimental

239 blocks.

## 240 **Data analysis**

241 Movement onset time was taken as the time at which hand speed first  
242 exceeded 2 cm/s. Reach directions were quantified at 20 percent of the radial  
243 distance between the start and the target. Reaches with absolute initial direction  
244 errors greater than 60° with respect to the target (movements that were more than  
245 60° to the left or the right of the target) were considered outliers, and were removed  
246 from analyses. Experiment1: StandardTaskErrors: 0.62%, NoTaskErrors 0.11%,  
247 EnforcedTaskErrors: 1.73%; Experiment2: TrainStandardTaskErrors: 0.29%,  
248 TrainEnforcedTaskErrors: 0.62%; TrainNoTaskErrors: 0.17%; Experiment 3: Same:  
249 0.30%, Different: 0.20%. Experiment 4:ShortDifferent: 3.82%; ShortSame: 4.31%,  
250 ShortNaive:4.59%). Excluding these trials did not have any qualitative impact on the  
251 results. Trials were averaged in cycles of eight (one trial for each target angle) for  
252 conversion to percent adaptation (see below). For graphing purposes, reach  
253 directions for participants who experienced counterclockwise rotations (30°) were  
254 sign-transformed and pooled with data for participants who experienced  
255 counterclockwise (30°) rotations: values closer to 30° indicate more complete  
256 adaptation.

257 For all blocks except the test block, we estimated adaptation performance as  
258 percent adaptation, which quantifies reach directions relative to the ideal reach  
259 direction (as shown in Hadjiosif & Smith, 2013).

$$260 \quad \textit{naive percent adaptation} = 100\% \times \frac{\textit{reach direction} - \textit{baseline bias}}{\textit{ideal reach direction} - \textit{baseline bias}} .$$

261

262 For the test block, we were interested in savings, which is improved learning  
263 at test compared to naïve. Even with exposure to the same number of no-rotation  
264 trials at washout as at training (480 trials), washout was often incomplete.  
265 Incomplete washout can inadvertently magnify estimates of savings. Estimates of  
266 savings thus needs to take into account the extent of washout. We estimated percent  
267 adaptation for the test block as follows, where reach biases in the washout phase  
268 were estimated as the mean of the final 3 cycles of the washout block, similar to  
269 Haith et al. (2015).

$$270 \quad \textit{test percent adaptation} = 100\% \times \frac{\textit{reach direction} - \textit{washout bias}}{\textit{ideal reach direction} - \textit{washout bias}}$$



271

272 To evaluate savings (improved adaptation compared to naïve), we selected  
273 first 5 cycles (i.e., the first 40 trials) of the naïve and test block for comparisons using  
274 Welch's t-tests (Delacre et al., 2017)(or Mann-Whitney U-tests if assumptions of  
275 normality were violated), as savings tends to be most evident at initial exposure/re-  
276 exposure to the rotation in visuomotor rotation paradigms. We note however that this  
277 window may miss important effects outside the first 5 cycles, particularly since  
278 adaptation is slower when task errors are removed or enforced (Kim et al., 2019;  
279 Leow et al., 2018). To avoid missing effects outside the first 5 cycles of the block, we  
280 additionally estimated performance in the entire adaptation block by splitting each  
281 60-cycle adaptation block into an early phase (estimated as mean percent  
282 adaptation from the first 30 cycles) and a late phase (estimated as mean percent  
283 adaptation from the last 30 cycles). To compare naïve to test adaptation  
284 performance, we used Training (naïve, test) x Phase (early, late) ANOVAs on early  
285 and late phase percent adaptation, with greenhouse-geisser corrections applied  
286 where appropriate. For Experiment 1, test block adaptation was compared to naïve  
287 block adaptation within the same group of participants. For Experiment 2, test block  
288 adaptation with a certain task error manipulation was compared to naïve adaptation  
289 from a different group with equivalent task error manipulations. Specifically, the  
290 TrainStandardTE group and the TrainEnforcedTE group experienced no task errors  
291 at test, and thus were compared to the naïve no task error block from the  
292 TrainNoTaskErrors group. The TrainNoTaskErrors group experienced standard task  
293 errors at test and thus were compared to the naïve standard task error block in the  
294 TrainStandardTaskErrors group. Similarly, for Experiment 3, test block adaptation  
295 with standard task errors was compared with the naïve standard task error block in  
296 the TrainStandardTaskError group from Experiment 2. For Experiment 4, test block  
297 adaptation with short preparation time and standard task errors were compared with  
298 data from a separate control group who experienced the same short preparation time  
299 and standard task error conditions, but who were naïve to any training to reduce task  
300 errors or sensory prediction errors.

301 A common alternative measure of savings is to assess for increases in rate  
302 constants, obtained by fitting the data to exponential functions. Rate constant  
303 analyses were not used here for the following reasons. For datasets where savings  
304 is evident as immediate adaptation in the first cycle upon perturbation exposure

305 (Huberdeau et al., 2015a; Landi et al., 2011), rate constants are typically small  
306 because the rapid initial adaptation is not captured by the fit. This can give the  
307 erroneous impression that savings is absent, and this situation was apparent in  
308 some of our data. When we tried to avoid this problem by fixing the fit parameter that  
309 reflects the y value when  $x = 0$  as the mean reach direction in the immediately  
310 previous no-rotation cycle, the fits poorly characterized the data. These results agree  
311 with previous work demonstrating that exponential functions poorly represent  
312 individual learning curves, which often show abrupt step-like increases in  
313 performance (Gallistel et al., 2004).

314 Statistical analyses were performed with SPSS and JASP. Graphs were  
315 plotted with GraphPad Prism version 7.00 for Windows, GraphPad Software, La Jolla  
316 California USA, [www.graphpad.com](http://www.graphpad.com).

## 317 **Results**

### 318 **Experiment 1: Task errors are important for savings**

319 In Experiment 1, we asked whether savings would be present if adaptation  
320 was learnt in the absence of task errors, or with task errors that were enforced  
321 regardless of the participants' actions. During training, all participants were exposed  
322 to a 30° rotation of cursor feedback. In the StandardTaskError condition, since the  
323 target was not moved within a trial, task errors were allowed to vary contingent upon  
324 participants' responses to the cursor perturbation (Figure 1B). Task errors were  
325 enforced in the EnforcedTaskError condition by moving the target mid-movement so  
326 that the cursor always missed the target by 20-30° (Figure 1E). Task errors were  
327 removed in the NoTaskError condition by moving the target to align with the cursor  
328 trajectory mid-movement (Figure 1H). After initial exposure to the visuomotor  
329 rotation, behaviour was returned to the unadapted state by removing the cursor  
330 rotation in a washout phase. During this washout, we also employed the  
331 NoTaskError manipulation across all groups to prevent experience of task errors  
332 upon abrupt removal of the cursor rotation. At the test block (i.e., the second  
333 exposure to the visuomotor rotation) we applied the same task error manipulations  
334 that each group experienced when they were initially exposed to the perturbation.

335 Reach directions across all cycles for groups are shown in Figure 1A. Both  
336 removing task errors and enforcing task errors slowed adaptation compared to  
337 experiencing standard task errors that were contingent upon the corrective

338 responses of the participant. One participant from the no task error group did not  
339 move towards the presented target in the cycles 41 to 47, which resulted in the  
340 variability that is apparent in the group average plot. The analysis outcomes were  
341 similar with and without this dataset.

342 With standard task errors, percent adaptation at test tended to improve  
343 compared to naïve immediately after rotation onset (Figure 1C), similar to Huberdeau  
344 et al. (2015a). This improvement was primarily evident in the first 8 trials of exposure  
345 to the cursor rotation (i.e., the first cycle), as adaptation in the first cycle improved at  
346 test compared to naïve (naïve: 8.5+/-6.6%, test: 32.0+/-8.6%, cohen's d=0.74).  
347 Improvements compared to naïve were marginal when estimated over the first 5  
348 cycles (naïve: 37.5+/- 3.9%; test: 53.4+/-8.6%,  $p=0.0554$ , cohen's d= 0.618). Block x  
349 Phase (early adaptation, late adaptation) ANOVA comparing the naïve and the test  
350 block showed a non-significant main effect of block and no significant interactions  
351 with block.

352 With enforced task errors (Figure 1H), percent adaptation in the first 5 cycles  
353 did not differ reliably at test (15.9+/-2.7%) compared to naïve (18.5+/-3.0%),  
354  $t(11)=0.663$ ,  $p=.521$ , cohen's d=0.192. Block x Phase (early adaptation, late  
355 adaptation) ANOVA comparing the naïve and the test block showed a non-significant  
356 main effect of block,  $F(1,11)=2.855$ ,  $p=0.119$ , partial  $\eta$ -squared=0.2, and no reliable  
357 interactions with block.

358 With no task errors (Figure 1I), percent adaptation in the first 5 cycles did not  
359 differ reliably from naïve (17.7+/-3.1%) to test (13.1+/-2.8%),  $t(11)=1.08$ ,  $p=.303$ ,  
360 cohen's d=0.3. Block x Phase ANOVA on the entire adaptation block showed worse  
361 adaptation at test (mean of the entire test block: 46.3+/-5.1%) compared to naïve  
362 (mean of the entire naïve block, 53.0+/-3.6%, figure 1I), significant main effect of  
363 block,  $F(1,11)=5.95$ ,  $p=0.033$ , partial  $\eta$ -squared=0.35.

364

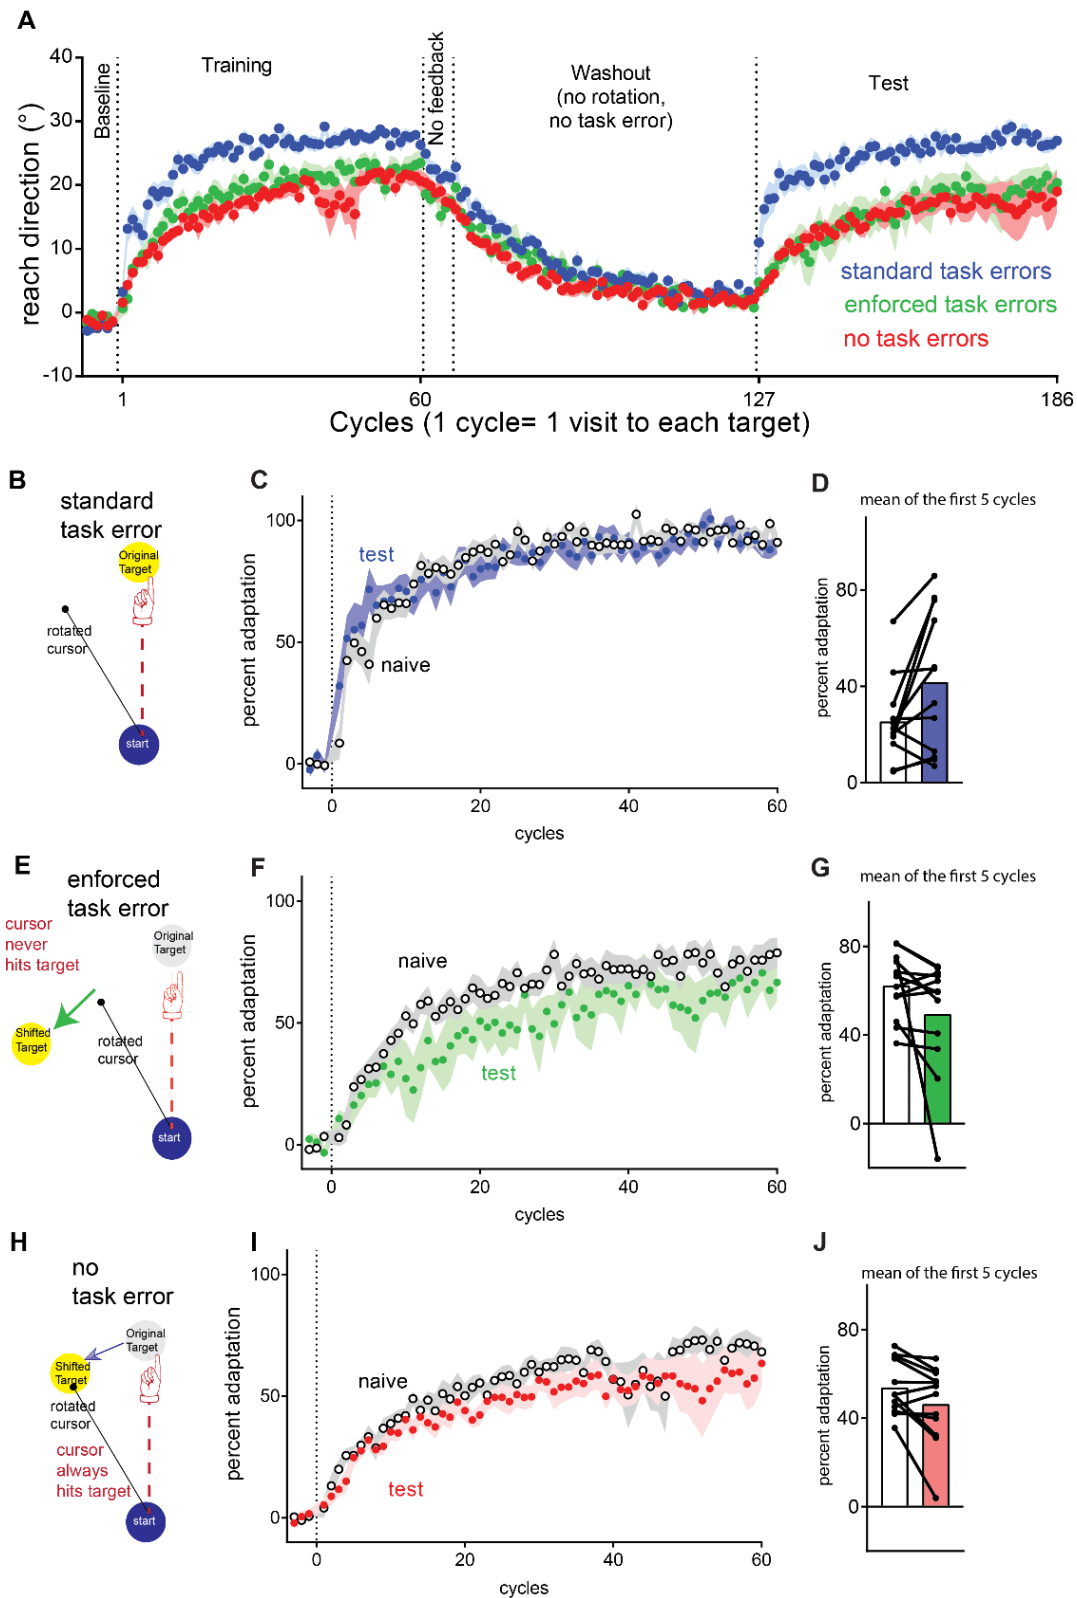

365

366

367

368

369

370

371

372

373

**Figure 1. Experiment 1: Despite re-exposure to the same rotation, savings was absent with no task errors or enforced task errors.** At both training and test (i.e., during exposure to a 30° cursor rotation, participants were exposed to either standard task errors (B), enforced task errors (E), or no task errors (H). Cycle averaged reach directions across all blocks (A). Cycle averaged percent adaptation compared to naïve white circles) (C, F, I), and mean percent adaptation averaged across cycles (D, F, G). Improved adaptation (greater percent adaptation) compared to naïve was evident with standard task errors (C & D), but not with enforced task errors (F&G), and not with no task errors (I & J). For D, F, G, error bars=95% CI. All other error bars are SEM.

374 Thus, despite exposure to the same cursor perturbation, and therefore  
375 previous experience of the similar sensory prediction errors, savings was not evident  
376 in the groups that did not experience correctable task errors as a result of the cursor  
377 perturbation.

## 378 **Experiment 2: Task errors are required at encoding but not at retrieval.**

379 The absence of savings when perturbation-induced task errors were removed  
380 suggests some role of perturbation-induced task errors in savings. A few  
381 interpretations are possible. First, task errors might act as a retrieval cue to trigger  
382 the memory that is responsible for savings (Huberdeau et al., 2015a). Second, task  
383 errors might be necessary to encode a memory that is responsible for savings. Third,  
384 task errors might be necessary both at encoding and at retrieval for savings: savings  
385 can only occur when previously experienced task errors are revisited. We  
386 dissociated these possibilities in Experiment 2. Task errors were manipulated either  
387 at training or at test to identify whether savings requires prior experience of task  
388 errors during first exposure to a perturbation (when a memory is first “encoded”) or  
389 when the perturbation is re-encountered (when a memory is “retrieved”). A  
390 TrainStandardTaskError group (n=12, 6CW, 6CCW) was deprived of task errors at  
391 test (target was shifted mid-movement so that the cursor always hit the target), but  
392 were provided standard task errors at training (i.e. no target shifts): absence of  
393 savings here would suggest that task errors are necessary as a retrieval cue for  
394 savings. A TrainNoTaskError group (n=12, 6CW, 6CCW) was deprived of task errors  
395 at training, but experienced standard task errors at test (target did not move mid-  
396 movement): absence of savings here would suggest that the task errors are not  
397 required as a retrieval cue, but are a necessary component to encoding a memory  
398 that results in savings. Does savings result from the experience of task errors alone,  
399 or does savings require learning to correct for task errors? To test this, a  
400 TrainEnforcedTaskError group (n=12, 6CW, 6CCW) were provided with enforced task  
401 errors at training (target always moves away from the cursor mid-trial, such that they  
402 could never succeed in reducing task errors), and were tested for savings in the  
403 absence of task errors. After training, all groups encountered 6 no-feedback cycles  
404 and 60 no-rotation washout cycles with no task error, and then re-encountered the  
405 same cursor rotation as they experienced at training. To evaluate savings, test  
406 performance was compared to the naive adaptation of another group who

407 experienced the same task error conditions. Specifically, the no task error test phase  
408 from the TrainStandardTaskError and the TrainEnforcedTaskError groups was  
409 compared to the no task error training phase of the TrainNoTaskError group. The  
410 standard task error test phase from the TrainNoTaskError group was compared to  
411 the standard task error training phase of the TrainStandardTaskError group.

412 Figure 2C shows that in the TrainStandardTaskError group, standard task  
413 errors at training resulted in better-than-naïve adaptation at test, even in the absence  
414 of task errors at test, as evidenced in better adaptation at the first 5 cycles at test  
415 (36.5+/-8.0%) compared to naïve (15.2+/-1.5%),  $t(11.7) = 2.61$ ,  $p = 0.016$ , Cohen's  
416  $d = 1.065$ . Similarly, Group (TrainStandardTaskError, Naïve) x Phase (Early  
417 Adaptation, Late Adaptation) ANOVA showed a significant main effect of Group:  
418  $F(1,22) = 10.211$ ,  $p = .004$ , partial  $\eta$ -squared = .317. Thus, a history of task errors  
419 improved re-adaptation to a cursor rotation even when the perturbation did not cause  
420 any task errors upon second exposure.

421 In the TrainEnforcedTaskError group (Figure 2F), adaptation in the first 5  
422 cycles did not differ reliably at test (17.6+/-4.1%) compared to naïve (15.2+/-1.4%),  
423  $t(13.7) = 0.561$ ,  $p = 0.584$ , Cohen's  $d = 0.229$ . Group (TrainEnforcedTaskError,  
424 Naïve) x Phase ANOVA showed no reliable main effect of Group,  $F(1,22) = 1.20$ ,  
425  $p = .285$ , partial  $\eta$ -squared = .052, and a non-significant Phase x Group interaction,  
426  $F(1,22) = 0.69$ ,  $p = 0.413$ , partial  $\eta$ -squared = 0.03. Enforcing task errors at training  
427 thus did not appear to improve adaptation compared to naïve when tested without  
428 task errors. Thus, merely experiencing task errors, without learning to correct for  
429 those task errors, was not sufficient to evoke subsequent savings.

430 In the TrainNoTaskError group (Figure 2I), adaptation in the first 5 cycles did  
431 not differ reliably at test (35.9+/-6.3%) compared to naïve (40.3+/-6%),  $t(21.9) =$   
432  $0.499$ ,  $p = 0.623$ , Cohen's  $d = 0.204$ . This lack of improvement compared to naïve  
433 was shown throughout the entire adaptation block (Figure 2I), as Group  
434 (TrainNoTaskError, Naïve) x Phase (Early, Late Adaptation) ANOVA showed a non-  
435 reliable main effect of group,  $F(1,22) = 1.38$ ,  $p = 0.25$ , partial  $\eta$ -squared = 0.05, and  
436 a non-reliable Phase x Group interaction,  $F(1,22) = 3.47$ ,  $p = 0.08$ , partial  $\eta$ -squared  
437 = 0.13. Thus, depriving participants of task errors when they were first exposed to  
438 the cursor rotation at training resulted in no savings despite the subsequent  
439 presence of standard task errors at test.

440           Thus, a history of adapting movements to correct task errors appears  
441   necessary to encode learning that improves adaptation to a previously experienced  
442   visuomotor rotation. The presence of task errors appears unnecessary to retrieve  
443   this learning.

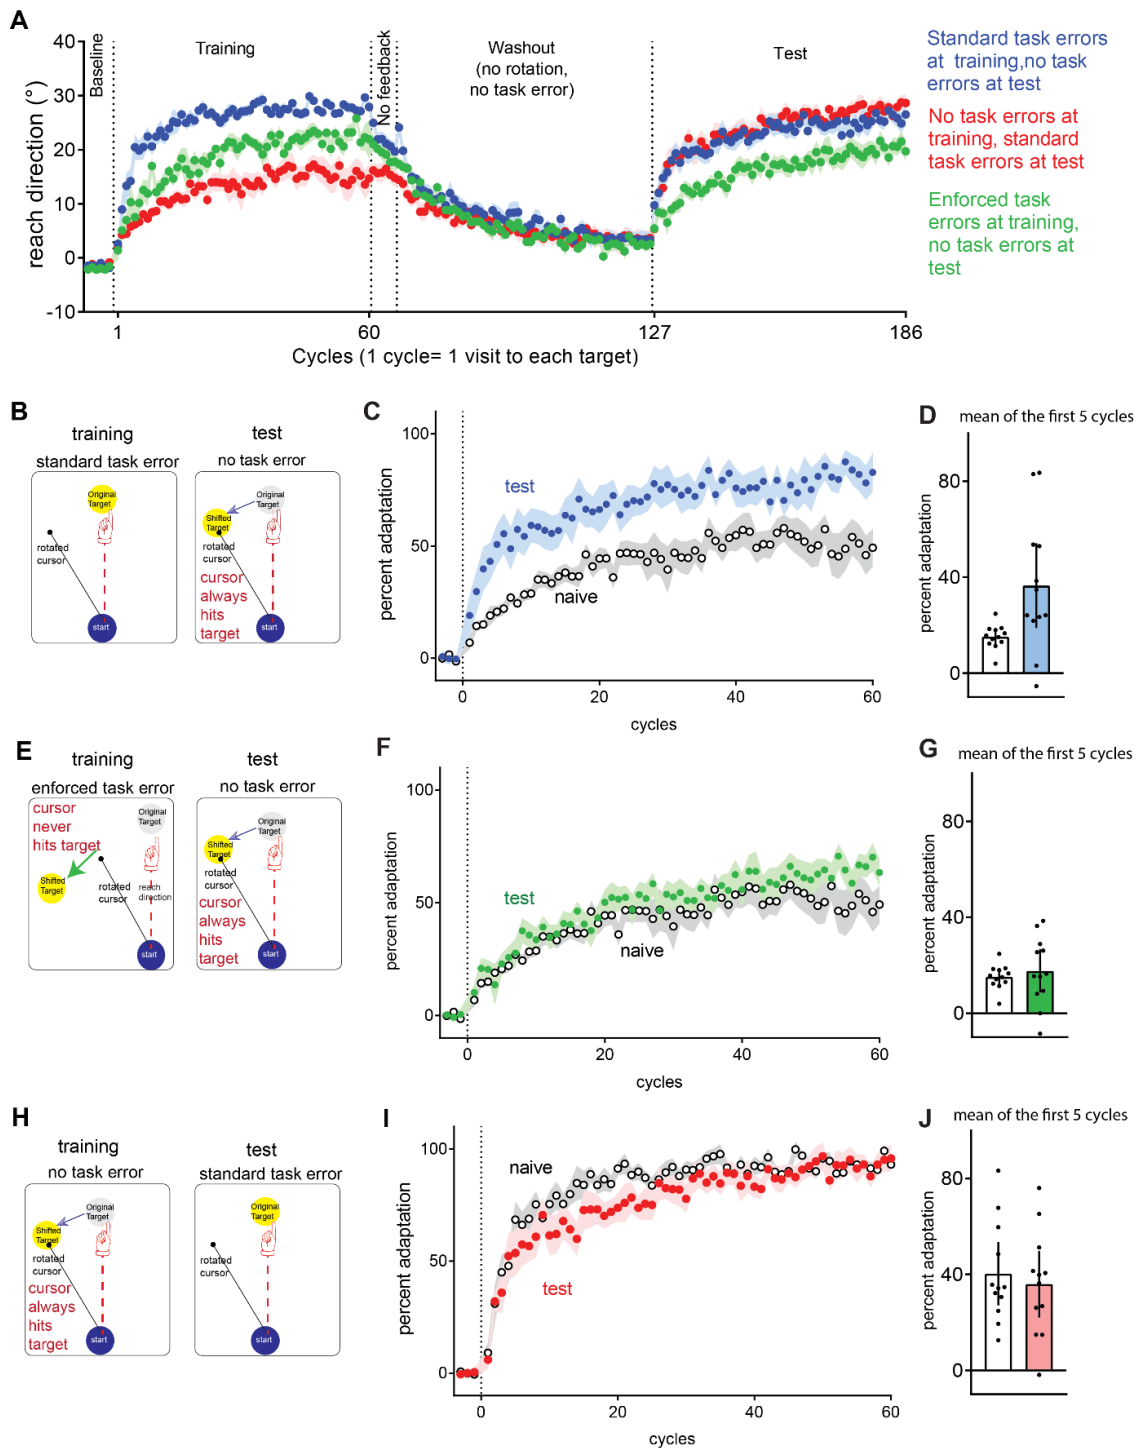

444

445 **Figure 2. Experiment 2 showed that savings requires a history of adaptation to task errors.**

446 During initial exposure to the cursor rotation (training), participants experienced task errors (either  
 447 standard task errors **(B)** or enforced task errors **(E)**, or experienced no task errors **(H)**). At re-exposure  
 448 to the cursor rotation (test), participants who experienced task errors at training were now deprived of  
 449 task errors **(B & E)** whereas participants who were deprived of task errors at training were now  
 450 provided task errors **(A)**. Note that task errors were removed at washout in all groups to ensure that abrupt removal of the perturbation would not  
 451 inadvertently evoke task errors. Clear symbols and white bars indicate naïve adaptation. **(B)**. Even  
 452 without task errors at test, a history of standard task errors at training improved subsequent  
 453 adaptation, (greater percent adaptation in C & D). In contrast, adaptation was not improved in the  
 454 group who experienced a history of enforced task errors that could not be corrected for (F&G).  
 455 Adaptation was also unimproved without a history of task errors at training, despite the presence of  
 456 task errors at test. (I & J). For D, F, G, error bars=95% CI. All other error bars are SEM.

458



459 **Experiment 3: Previous learning to correct for task errors can evoke savings.**

460 Recent work suggests that savings in visuomotor rotation primarily reflects the  
461 deliberate application of a strategy, where participants explicitly re-aim to the one  
462 side of a target to counteract the rotation of cursor feedback (Haith et al., 2015;  
463 Morehead et al., 2015). This view considers the role of implicit adaptation to sensory  
464 prediction errors as secondary to the role of strategy in savings, and would interpret  
465 the presence/absence of savings with task errors in Experiments 1 and 2 to be  
466 because task errors provoke the formation of explicit strategies. An alternative view  
467 is that task errors alter the sensitivity to sensory prediction errors (Kim et al., 2019;  
468 Leow et al., 2018), and increased sensitivity to these errors produce savings  
469 (Herzfeld et al., 2014). We cannot dissociate between the two alternative  
470 explanations based on data from Experiments 1 and 2 alone because task errors  
471 here were not wholly independent of sensory prediction errors; the task error  
472 manipulations were always made in the presence of a perturbation of the hand-  
473 cursor relationship (which therefore induced sensory prediction errors). Thus, we  
474 next examined how learning to correct for task errors alone, in the absence of  
475 sensory prediction errors (i.e., in the absence of any perturbation of the hand-cursor  
476 relationship), affected subsequent adaptation to a visuomotor rotation.

477 In Experiment 3, we did not perturb the cursor at training, but enforced  
478 systematic task errors that could be counteracted by a re-aiming strategy: the target  
479 always moved away by 30° from the original target location mid-movement:  
480 participants could correct these task errors by re-aiming 30° away from the original  
481 target (see Figure 3a). For one group of participants, the reach solution needed to hit  
482 a given target after it jumped mid-movement was the same reach solution needed to  
483 counteract the cursor rotation in the test block (**Same**, n=12, 6 CW, 6 CCW). For  
484 example, if the target jump at training was 30° counterclockwise, then the cursor  
485 rotation at test was 30° clockwise (thus requiring a counterclockwise compensatory  
486 hand movement). To test whether this learning is flexible enough to accommodate a  
487 different reach solution, we had another group of naïve participants (**Different**, n=12,  
488 6 CCW, 6CW), where the reach direction required to hit targets at training was  
489 opposite to that at test. Pilot testing revealed substantial individual differences in how  
490 quickly participants developed a strategy to re-aim at training. Thus, if the  
491 experimenter observed that participants had yet to show successful re-aiming by trial

492 180 of the 480-trial training block, the experimenter explicitly instructed participants  
493 that a strategy may be needed to hit the target. This explicit instruction was required  
494 in 2 of the 12 participants in the Same group, and 6 of the 12 participants in the  
495 Different group. Here, the instruction was given without exposure to the cursor  
496 perturbation but after exposure to the *task* error. At the test block, no instructions  
497 about re-aiming were provided. To quantify savings, we compared percent  
498 adaptation at test to naïve controls who experienced similar task error manipulations  
499 (i.e., the naïve adaptation block from the group who experienced standard task  
500 errors at training in Experiment 2).

501 Figure 3B shows reach directions in all cycles. After instructing participants  
502 that the task error manipulation had been removed, reach directions reverted rapidly  
503 back to baseline in the no-feedback block. This illustrates that the re-aiming  
504 response can be switched off immediately upon instruction.

505 Despite being naïve to the cursor rotation, improved adaptation was evident  
506 when the reach solution at test was the same as training (Figure 3C), as better  
507 adaptation at test was evident in the first 5 cycles at test ( $69.1 \pm 8.7\%$ ) compared to  
508 naïve ( $40.3 \pm 6\%$ ),  $t(19.5) = 2.722$ ,  $p = 0.013$ ,  $\text{cohen's } d = 1.111$ . This effect was  
509 primarily limited to the first 5 cycles, as analyses on the entire adaptation block via  
510 Group x Phase (Early, Late Adaptation) ANOVA showed a unreliable main effect of  
511 Group,  $F(1,22) = 2.82$ ,  $p = 0.107$ ,  $\text{partial } \eta\text{-squared} = 0.11$ , and an unreliable Phase  
512 x Group interaction,  $F(1,22) = 1.1$ ,  $p = 0.304$ ,  $\text{partial } \eta\text{-squared} = 0.04$ . Similarly,  
513 improved adaptation was evident when the reach solution at test was opposite to  
514 that at training (Figure 3E), as evident in better adaptation in the first 5 cycles at test  
515 ( $72.2 \pm 6.7\%$ ) compared to naïve ( $40.3 \pm 6\%$ ),  $t(21.7) = 3.558$ ,  $p = 0.002$ ,  $\text{cohen's } d = 1.453$ .  
516 Group x Phase (Early, Late Adaptation) ANOVA showed a main effect of  
517 Group,  $F(1,22) = 8.11$ ,  $p = 0.00934$ ,  $\text{partial } \eta\text{-squared} = 0.26$ . The Phase x Group  
518 interaction was not reliable,  $F(1,22) = 1.75$ ,  $p = 0.199$ ,  $\text{partial } \eta\text{-squared} = 0.07$ .

519 Hence, previous learning to counteract task errors was sufficient to improve  
520 subsequent adaptation to a visuomotor rotation, even when participants were naïve  
521 to perturbation-induced sensory prediction errors. This learning was flexible: it  
522 elicited savings even when the reach solution required to hit a given target at training  
523 was different from the reach solution required to hit that target at test.

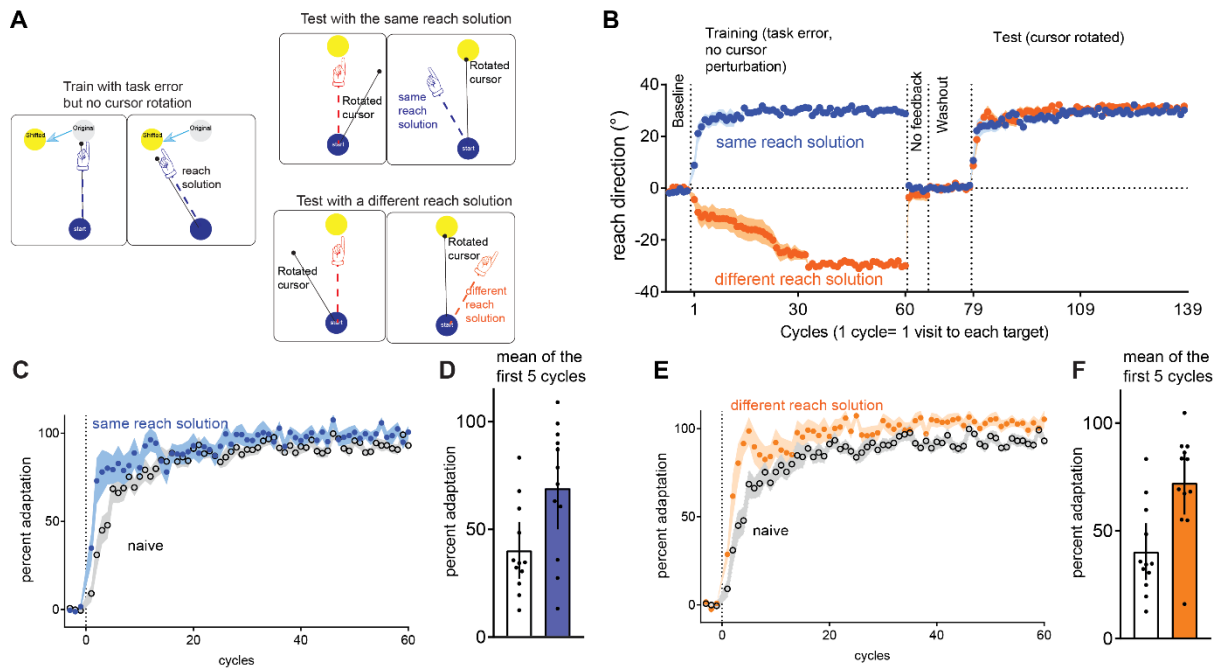

524

525 **Figure 3. Experiment 3 shows that previous learning to correct for task errors in the absence**  
 526 **of sensory prediction errors can evoke savings in visuomotor rotation.** To test whether previous  
 527 learning to counteract task errors could improve naive adaptation (i.e., when participants were naive  
 528 to perturbations of sensory feedback), we did not impose a cursor rotation at training, but rather  
 529 moved the target away from its original position by 30° at mid-movement. To hit the target,  
 530 participants had to re-aim by 30°. Participants rapidly reverted to baseline performance after  
 531 receiving instructions that all disturbances had been removed. At test, participants encountered a 30°  
 532 cursor rotation for the first time. One group (Same) had the cursor rotation in the opposite direction  
 533 as the target movement direction during training, such that the participants could use the same reach  
 534 solution at training and test. The other group (Different) had the cursor rotation in the same direction  
 535 as the target movement direction during training, such that participants had directionally opposite  
 536 reach solutions at training and test. (B). Cycle-averaged reach directions throughout the experiment,  
 537 where each symbol represents 1 cycle (1 visit to each target), and reaches closer to 30° during test  
 538 represent reaches that more adapted. Cycle-averaged percent adaptation during test (filled circles)  
 539 compared to naive (clear circles) for the same reach solution (C) and the different reach solution (E).  
 540 Mean percent adaptation averaged over the first 5 cycles with the same solution (D) and with a  
 541 different solution (F) Savings was evident in more adapted reaches compared to naive (clear  
 542 symbols) for both the Same group (C & D) and the Different group (E & F). For D & F, error bars=95%  
 543 CI. All other error bars are SEM.

#### 544 **Experiment 4: Expressing a memory of task errors at short latencies.**

545 We next explored the mechanisms by which learning to compensate for task  
 546 errors can improve subsequent visuomotor rotation adaptation. Task error correction  
 547 likely relies on strategic processes that demand cognitive resources, because error  
 548 compensation is reduced by manipulations that limit cognitive resources, such as  
 549 time-constraints or a dual task (Anguera et al., 2012; Fernandez-Ruiz et al., 2011;  
 550 Galea et al., 2010; Haith et al., 2015; Leow et al., 2017; Malone et al.; Taylor et al.,  
 551 2007, 2008). In visuomotor rotation paradigms, these observations are consistent  
 552 with the notion that mental rotation of a movement plan at a specified angle away  
 553 from a target is computationally expensive, and requires time (Bhat et al., 1998;

554 Georgopoulos et al., 1987; Pellizzer et al., 1993). Could savings occur even when  
555 these time-consuming cognitive processes were suppressed by limiting preparation  
556 time? To explore this, we replicated the design of Experiment 3, except that  
557 participants were required to move within a short preparation time of 250ms after the  
558 time of target presentation throughout all trials. We used the timed-response  
559 paradigm we described previously in the methods for all the previous experiments,  
560 but instead of presenting the target at 1000ms before the imperative to move, we  
561 now present the target 250ms before the imperative to move (Leow et al., 2017).  
562 There were two conditions: **ShortSame** (n=12, 6 CW, 6 CCW), where the reach  
563 solution is the same at training and at test, and **ShortDifferent**, (n=12, 6 CW, 6  
564 CCW), where the reach solution is opposite at training and at test. Cycle-averaged  
565 reach directions are shown in Figure 4. At training, despite the preparation time  
566 constraints, participants did learn to compensate for task errors (Figure 4B), as  
567 percent adaptation was larger at the late phase of the training block than the early  
568 phase, as shown by a significant main effect of Phase,  $F(1, 23) = 57.1, p=1.1e-7$ ,  
569 partial eta-squared=0.7. However, the extent of compensation (estimated as the last  
570 10 cycles) was less complete with short preparation time in Experiment 4  
571 (ShortSame: 51.5+/-3.5%, ShortDifferent: 54.4+/-4.9%) than with long preparation  
572 time in Experiment 3 (Same 98.9+/-1.8%, Different: 97.4+/-2.5%), as  
573 ReachSolutionDirection (Same, Different) x Preparation Time (Short, Long) showed  
574 a significant main effect of preparation time  $F(1, 44) = 179.3, p = 4.0e-17$ , partial eta-  
575 squared = 0.8.

576 We compared adaptation performance in the test block to a naïve control  
577 group tested under similar preparation time and task error conditions (ShortNaive,  
578 n=12, 6 CW, 6 CCW). In the ShortSame group who trained with the same reach  
579 solution at test and training, adaptation at test was better than naïve (Figure 4C), as  
580 mean of the first 5 cycles of the test block, 44.7+/-3.4% was better than naïve,  
581 26.9+/-2.9%,  $t(21.6) = 3.964, p=6.581e-4$ , cohen's  $d=1.618$ ). Improved adaptation  
582 compared to naïve was primarily concentrated in the first 5 cycles, as examining the  
583 entire adaptation block with a Group x Phase (Early, Late adaptation) ANOVA  
584 yielded a non-significant effect of Group  $F(1,22) = 0.01, p = 0.898$ , partial  $\eta$ -squared  
585 = 0, and a non-significant Phase x Group interaction,  $F(1,22) = 0.17, p = 0.679$ ,  
586 partial  $\eta$ -squared = 0.

587 When the reach solution at test differed from that at training in the  
588 ShortDifferent group, test performance was **worse** than naïve (Figure 4E). Percent  
589 adaptation in the first 5 cycles at test (11.8+/-4.4%) was worse than naïve (26.9+/-  
590 2.9%),  $t(19.2)= 2.839$ ,  $p= 0.010$ , cohen's  $d = 1.159$ . This was despite the fact that  
591 participants had already disengaged the previously learnt reach solution in the  
592 preceding no-rotation blocks with instruction (Figure 4B). Group x Phase (Early, Late  
593 adaptation) on the entire adaptation block showed a Phase x Group interaction,  
594  $F(1,22) = 9.59$ ,  $p = 0.00524$ , partial  $\eta$ -squared = 0.3, as worse adaptation tended to  
595 occur in the early phase (i.e., the first 30 cycles) but not in the late phase (the final  
596 30 cycles) (see Figure 4E).

597

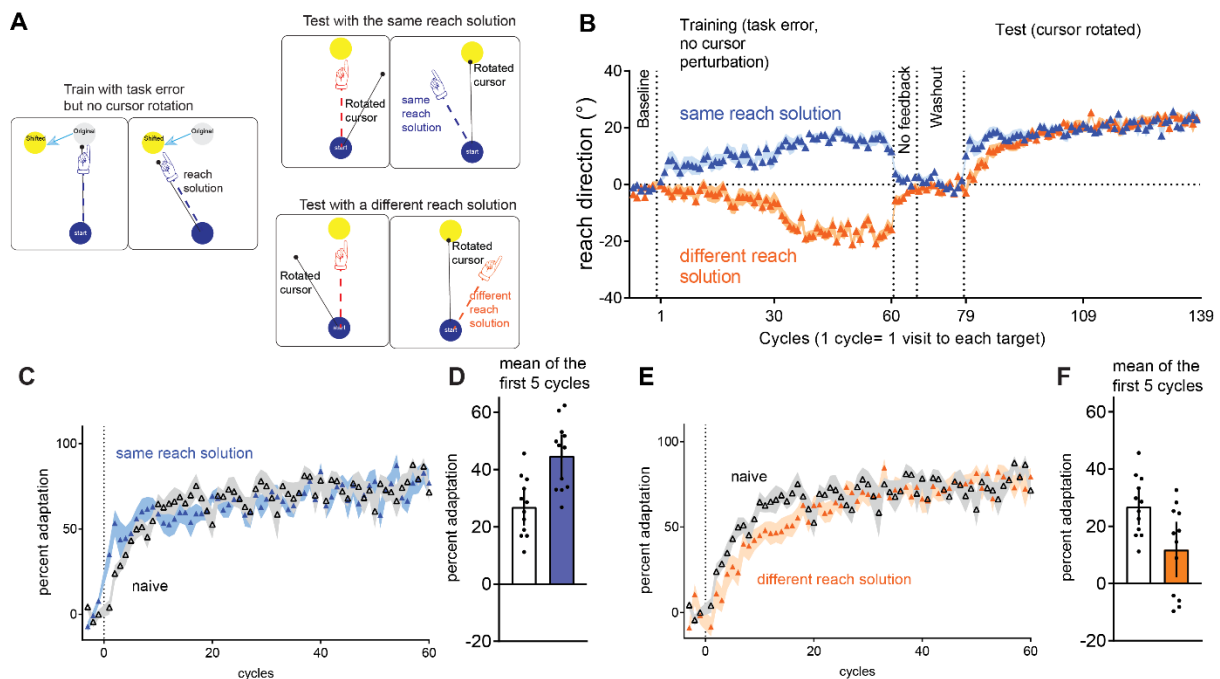

598

599 **Figure 4.** Experiment 4 replicates the design of Experiment 3, except that participants completed all  
600 trials under short preparation time of 250ms (A). Cycle-averaged reach directions, where each circle  
601 represents 1 cycle, or 1 visit to each target (B). Cycle-averaged percent adaptation during test (filled  
602 triangles) compared to naïve (clear triangles) for the same reach solution (C) and the different reach  
603 solution (E). Mean percent adaptation averaged over the first 5 cycles with the same solution (D) and  
604 with a different solution (F). Savings was evident in more adapted reaches compared to naïve (clear  
605 symbols) for the ShortSame group (C & D). For the ShortDifferent group, adaptation was worse than  
606 naïve (E & F). For D & F, error bars=95% CI. All other error bars are SEM.

607

608

## 609 **Discussion**

610 In this work, we demonstrate a fundamental role for task errors in savings for  
611 visuomotor rotation adaptation; a phenomenon that is a hallmark of latent  
612 sensorimotor memory. We show that savings was absent without prior experience of  
613 task errors (Experiments 1 & 2), and that prior correction of task errors, even without  
614 prior exposure to sensory prediction errors, is sufficient to elicit savings (Experiments  
615 3 & 4). Thus, systematic task errors that prompt adaptive motor responses can affect  
616 subsequent adaptation to never-before encountered sensorimotor perturbations. The  
617 results reinforce the notion that adaptive responses to sensorimotor perturbations  
618 take multiple forms, and suggest that task errors play a primary role in driving  
619 improved performance upon exposure to novel sensorimotor conditions. In particular,  
620 we suggest that latent sensorimotor memories, which improve subsequent  
621 adaptation, rely on (at least) two distinct components, both of which are driven by the  
622 failure to attain movement goals. The first is a strategic component that is flexible  
623 enough to facilitate corrective responses in the opposite direction, but that requires  
624 substantial preparation time. The second component is a set of inflexible stimulus-  
625 response associations between targets and reach directions, that can be expressed  
626 under time-pressure.

### 627 **A history of adaptation to task errors are necessary for savings**

628 An influential model of sensorimotor adaptation suggests that a history of  
629 errors increases sensitivity to those errors, resulting in improved learning when  
630 familiar errors are re-encountered (Herzfeld et al., 2014). Sensorimotor perturbations  
631 typically evoke both sensory prediction errors and task errors, but it was previously  
632 unclear how these errors contribute to latent sensorimotor memories that improve  
633 learning (Leow et al., 2016; Orban de Xivry & Lefevre, 2015). Here we show that, at  
634 least in visuomotor rotation paradigms, a history of adaptation to task errors is crucial  
635 to encode latent memories that improve subsequent adaptation. Task errors that  
636 could not be corrected (i.e., enforced task errors that occurred regardless of the  
637 participants' behaviour) did not improve learning. Furthermore, Experiment 2 showed  
638 that task errors need not be present upon re-exposure to the perturbation,  
639 contradicting the proposal that task errors act as a retrieval cue to trigger savings  
640 (Huberdeau et al., 2015a).

## 641 **Savings do not require a history of sensory prediction errors**

642 The results of Experiments 1 and 2 are consistent with the idea that savings  
643 results from a memory that requires task errors for its encoding. What is the nature  
644 of this learning? One possibility is that task errors drive deliberate corrective  
645 responses during adaptation (McDougle et al., 2016), and that faster subsequent  
646 recognition and/ or selection of actions that correct task errors accounts for savings  
647 (Haith et al., 2015; Huberdeau et al., 2015a; Huberdeau et al., 2015b; Morehead et  
648 al., 2015). If this is true, then deliberate correction of task errors alone, even when  
649 naïve to sensory prediction errors, should be sufficient for savings. To the best of our  
650 knowledge, this question was not previously addressed (Haith et al., 2015;  
651 Huberdeau et al., 2017; Morehead et al., 2015; Orban de Xivry & Lefevre, 2015). We  
652 therefore tested this in Experiment 3, where a systematic task error was imposed at  
653 training (targets always jumped mid-movement by 30°) without any perturbation of  
654 hand position feedback. Training to correct for these task errors improved  
655 subsequent adaptation to the 30° rotation of hand position feedback compared to  
656 naïve participants, even though we did not provide any instruction to apply previous  
657 learning. Thus, learning to counteract task errors in the absence of a sensorimotor  
658 perturbation was enough to improve adaptation to a never-before encountered  
659 sensorimotor perturbation.

## 660 **How might correction of task errors lead to savings?**

661 Exactly what is encoded when task errors are corrected? In Experiment 3, we  
662 found that adaptive responses to task errors can be switched off upon instruction  
663 that the perturbation has been removed, but that this learning was still retained in  
664 latent form to affect subsequent adaptation when a similar context was encountered.  
665 This suggests that this form of sensorimotor learning is fundamentally distinct from  
666 the adaptive responses to sensory prediction errors, which are expressed in an  
667 obligatory manner for many trials after the perturbation is removed. The persistent  
668 and obligatory response to sensory prediction error is often conceived as remapping  
669 between a desired movement direction (i.e., a motor plan) and the motor commands  
670 that are generated to ~~achieve~~ execute the movement. We speculate that the  
671 contextually flexible adaptive response to task errors arises from an earlier  
672 component of the sensory to motor transformation: a mapping between the  
673 behavioural goal and the motor plan selected to achieve it. This would be consistent

674 with a non-obligatory expression of the learning, because we can choose to achieve  
675 behavioural goals in many different ways.

676         Given that we can instruct participants to deliberately use re-aiming strategies  
677 to reduce errors (Benson et al., 2011; Mazzoni et al., 2006; Savoie et al., 2018;  
678 Schween et al., 2014; Taylor et al., 2011), it is possible that a history of deliberately  
679 correcting for task errors (induced by target jumps) led to savings (under visuomotor  
680 rotation conditions) by prompting acquisition of a re-aiming strategy. Indeed, one  
681 view is that savings results solely from deliberate strategy use (Morehead et al.,  
682 2015). This view is supported by findings of no savings when cognitive resources are  
683 suppressed by shortening movement preparation time during visuomotor adaptation  
684 (Haith et al., 2015). Time pressure presumably suppresses time-consuming mental  
685 rotation processes required to re-aim at a planned angle away from the presented  
686 target (Bhat & Sanes, 1998; Georgopoulos & Massey, 1987; Pellizzer &  
687 Georgopoulos, 1993). In contrast, recent findings show savings despite time  
688 pressure when participants were allowed repeated episodes of adaptation to  
689 opposing visuomotor rotation perturbations (Huberdeau et al., 2017). How might one  
690 reconcile these findings? We think that the savings shown in that study might result  
691 from residual capacity to re-aim away from a target despite short latencies, as the  
692 rotations were only applied to one of two possible targets. It is clear that when there  
693 is a small target set size (i.e., a small predictable range of required movements, for  
694 example when there were only two targets in McDougle et al. (2019), or when the  
695 targets were distributed in a narrow, predictable range in Leow et al. (2017)), time-  
696 pressure does not prevent people from aiming at a specified angle away from a  
697 target. McDougle and Taylor (2019) showed that small set sizes promotes caching of  
698 stimulus-response associations between targets and corresponding required  
699 movements. When the required response was less predictable (i.e., with 8 or 12  
700 targets randomly presented in a wide spatial array), time pressure resulted in  
701 intermediate reaches that only partially compensated for the rotation—increasing  
702 time-pressure corresponded with less complete compensation (Leow et al., 2017;  
703 McDougle & Taylor, 2019), consistent with analog movement re-planning via mental  
704 rotation.

705         What are the contributions of stimulus-response associations and mental  
706 rotation to savings? We explored this in Experiment 4 by replicating Experiment 3,



707 but limiting preparation time. Given the 8-target array, the required response was  
708 less predictable than in Huberdeau et al. (2017). At training, time pressure resulted  
709 in incomplete compensation, as consistent with the results of Leow et al. (2017);  
710 McDougale and Taylor (2019), implying a restriction in mental rotation. Despite this,  
711 adaptation was better-than-naïve when the reach solution at test was the same as at  
712 training, and *worse* than naïve when the reach solutions were opposite at training  
713 and test. We interpret the findings as follows. Task errors in visuomotor rotation  
714 tasks typically provoke both mental rotation and stimulus-response associations.  
715 Time-pressure suppresses mental rotation capacity, but might not prevent the  
716 formation of stimulus-response associations between target errors and reach  
717 solutions. We think such associations were formed in our Experiment 4, and that,  
718 after washout, these latent stimulus-response associations were re-expressed when  
719 confronted with a similar sensorimotor context (in this case, experiencing errors to  
720 the side of targets). This learned association elicits savings when reach solutions for  
721 each target are the same at training and test, and interference when the reach  
722 solutions differ. This interference is particularly interesting, because it occurred  
723 despite participants being obviously able to volitionally disengage recently learned  
724 reach solutions in the preceding no-rotation trials with similar time demands.  
725 Maladaptive retrieval of an inappropriate reach solution might thus be triggered by  
726 task errors (which were absent in the preceding no-feedback, no-rotation trials), and  
727 this pre-potent response to the trigger was poorly inhibited under time pressure. An  
728 alternative interpretation is that practice of mentally rotating a target in one direction  
729 at training makes it more difficult to mentally rotate the target in the opposite  
730 direction under time-pressure at test, because prior mental rotation can interfere with  
731 subsequent mental rotation in an opposite direction (Sack et al., 2007). An important  
732 clue to identify which potential explanation is more likely comes from findings of  
733 deficient savings (Bedard et al., 2011; Leow et al., 2013; Leow et al., 2012; Marinelli  
734 et al., 2009) and anterograde interference in Parkinson's disease (Leow et al., 2013).  
735 Here, the better performance of Parkinson's disease patients when adapting to a  
736 rotation opposite to that previously experienced (Leow et al., 2013) seems unlikely to  
737 result from superior mental rotation. Parsimony therefore suggests that the more  
738 likely culprit is deficient acquisition of stimulus-response associations at initial  
739 learning (Foerde et al., 2011; Shohamy et al., 2006; Vo et al., 2014). Our current

740 data therefore suggest that inflexible stimulus-response associations can contribute  
741 to latent sensorimotor memories.

742         Although we demonstrate a role for learning to correct task errors in improving  
743 adaptation, we do not yet fully understand *how* task errors affect learning in typical  
744 sensorimotor adaptation where task errors and sensory prediction errors co-occur.  
745 Several possibilities exist. One possibility is that task errors might modulate the  
746 sensitivity to sensory prediction errors, and this increased sensitivity might elicit a  
747 gain in adaptation rate (Kim et al., 2019). There is some evidence to support this  
748 hypothesis, as task errors can modulate the alteration of sensorimotor maps as a  
749 result of exposure to sensory prediction errors (Kim et al., 2019; Leow et al., 2018;  
750 Reichenthal et al., 2016; Schaefer et al., 2012; Welch, 1969). An alternative  
751 possibility is that adaptation to task errors and adaptation to sensory prediction  
752 occurs independently. More work is required to dissociate these possibilities.

753         We also do not yet understand the role of correcting task errors in adaptation  
754 to different sensorimotor perturbations which are less likely to provoke easily  
755 verbalizable strategies (e.g. force-field adaptation, split-belt treadmill adaptation) and  
756 in paradigms that are less likely to be influenced by time-consuming deliberate  
757 strategies, such as saccadic adaptation (Kojima et al., 2004). It is clear that volitional  
758 strategies can influence adaptation in all of these paradigms (e.g., de'Sperati, 1999;  
759 Hwang et al., 2006), but it is currently unclear to what extent strategies contribute to  
760 improved re-adaptation in these paradigms. In split-belt treadmill adaptation for  
761 example, people can strategically improve adaptation by visual feedback of their  
762 perturbation-induced gait asymmetry, and yet fail to express this improvement upon  
763 removal of visual feedback; thus failing to augment savings by explicit strategy use  
764 (Leech et al., 2018). If and how stimulus-response associations might play a role in  
765 these paradigms is even less clear. Another open question is if and how stimulus-  
766 response associations are contextually dependent, as savings is clearly modulated  
767 by context (Song et al., 2015; Yin et al., 2014). Furthermore, although we  
768 demonstrate a role of stimulus-response associations in savings despite time-  
769 pressure, we do not discount the possibility that extended training might improve  
770 mental rotation skill to allow savings under time-pressure regardless of set size,  
771 perturbation direction, or perturbation magnitude during adaptation to a visuomotor  
772 rotation (Provost et al., 2013; Wright et al., 2008).

773           How does the brain form latent sensorimotor memories in response to task  
774 errors? We speculate that task errors prompt the formation of a new motor plan,  
775 which specifies the required parameters of the action required to achieve the desired  
776 outcome under new conditions. Achieving a desired outcome (e.g., a cancellation of  
777 task error) forms an association between the stimulus (e.g., a task error for a given  
778 target) and the response (the modified movement plan needed to restore task  
779 success). This association is readily retriggered by task errors. Learning to alter  
780 movement plans, even without actually executing the motor plan, might play a crucial  
781 role in sensorimotor adaptation (Sheahan et al., 2018; Vyas et al., 2018). For  
782 example, monkeys who learn to move a cursor with a brain-machine interface (i.e.,  
783 without moving their hands) show accelerated adaptation when first using their hand  
784 to move a cursor (Vyas et al., 2018). Similarly, although people fail to concurrently  
785 adapt to opposing perturbations, concurrent adaptation is possible when different  
786 motor plans are tagged to opposing perturbations (Sheahan et al., 2018).

## 787 **Summary**

788           Our results show that failures to attain movement goals, or task errors, are a  
789 fundamental driver of latent sensorimotor memories that improve adaptation to  
790 sensorimotor perturbations. Flexible, strategic processes and inflexible cached  
791 stimulus-response associations that arise in response to task errors both contribute  
792 to savings in visuomotor adaptation. The data demonstrate the richness of  
793 behavioural responses to sensorimotor perturbations, and suggest that some  
794 principles regarding the adaptative responses to sensorimotor perturbations may be  
795 more broadly applicable to alternative motor learning contexts than previously  
796 recognised.

## 797 **References**

- 798 Anguera, J. A., Bernard, J. A., Jaeggi, S. M., Buschkuhl, M., Benson, B. L., Jennett, S., Humfleet, J.,  
799 Reuter-Lorenz, P. A., Jonides, J., & Seidler, R. D. (2012). The effects of working memory  
800 resource depletion and training on sensorimotor adaptation. *Behav Brain Res*, 228(1), 107-  
801 115. doi:10.1016/j.bbr.2011.11.040
- 802 Avraham, G., Keizman, M., & Shmuelof, L. (2019). Environmental Consistency Modulation of Error  
803 Sensitivity During Motor Adaptation is Explicitly Controlled. *BioRxiv*, 528752.  
804 doi:10.1101/528752
- 805 Bedard, P., & Sanes, J. N. (2011). Basal ganglia-dependent processes in recalling learned visual-  
806 motor adaptations. *Exp Brain Res*, 209(3), 385-393. doi:10.1007/s00221-011-2561-y
- 807 Benson, B. L., Anguera, J. A., & Seidler, R. D. (2011). A spatial explicit strategy reduces error but  
808 interferes with sensorimotor adaptation. *J Neurophysiol*, 105(6), 2843-2851.  
809 doi:10.1152/jn.00002.2011
- 810 Bhat, R. B., & Sanes, J. N. (1998). Cognitive channels computing action distance and direction. *J*

- 811 *Neurosci*, 18(18), 7566-7580.
- 812 Brashers-Krug, T., Shadmehr, R., & Bizzi, E. (1996). Consolidation in human motor memory. *Nature*,  
813 382(6588), 252-255. doi:10.1038/382252a0
- 814 Braun, D. A., Aertsen, A., Wolpert, D. M., & Mehring, C. (2009). Motor task variation induces  
815 structural learning. *Curr Biol*, 19(4), 352-357. doi:10.1016/j.cub.2009.01.036
- 816 Cassady, K., Ruitenbergh, M., Koppelmans, V., Reuter-Lorenz, P., De Dios, Y., Gadd, N., Wood, S.,  
817 Riascos Castenada, R., Kofman, I., Bloomberg, J., Mulavara, A., & Seidler, R. (2018). Neural  
818 predictors of sensorimotor adaptation rate and savings. *Hum Brain Mapp*, 39(4), 1516-1531.  
819 doi:10.1002/hbm.23924
- 820 Cunningham, H. A. (1989). Aiming error under transformed spatial mappings suggests a structure for  
821 visual-motor maps. *J Exp Psychol Hum Percept Perform*, 15(3), 493-506.
- 822 Day, K. A., Leech, K. A., Roemmich, R. T., & Bastian, A. J. (2018). Accelerating locomotor savings  
823 in learning: compressing four training days to one. *J Neurophysiol*, 119(6), 2100-2113.  
824 doi:10.1152/jn.00903.2017
- 825 de'Sperati, C. (1999). Saccades to mentally rotated targets. *Experimental Brain Research*, 126(4),  
826 563-577. doi:DOI 10.1007/s002210050765
- 827 de Brouwer, A. J., Albaghdadi, M., Flanagan, R., & Gallivan, J. P. (2017). Gaze Behaviour During  
828 Sensorimotor Adaptation Parcellates the Explicit and Implicit Contributions to Learning.  
829 *BioRxiv*, 237651.
- 830 Delacre, M., Lakens, D., & Leys, C. (2017). Why Psychologists Should by Default Use Welch's t-test  
831 Instead of Student's t-test. *International Review of Social Psychology*, 30(1).
- 832 Diedrichsen, J., Hashambhoy, Y., Rane, T., & Shadmehr, R. (2005). Neural correlates of reach errors.  
833 *J Neurosci*, 25(43), 9919-9931. doi:10.1523/JNEUROSCI.1874-05.2005
- 834 Dietz, V., Zijlstra, W., & Duysens, J. (1994). Human neuronal interlimb coordination during split-belt  
835 locomotion. *Exp Brain Res*, 101(3), 513-520.
- 836 Favilla, M., & De Cecco, E. (1996). Parallel direction and extent specification of planar reaching arm  
837 movements in humans. *Neuropsychologia*, 34(6), 609-613.
- 838 Fernandez-Ruiz, J., Wong, W., Armstrong, I. T., & Flanagan, J. R. (2011). Relation between reaction  
839 time and reach errors during visuomotor adaptation. *Behav Brain Res*, 219(1), 8-14.  
840 doi:10.1016/j.bbr.2010.11.060
- 841 Flook, J. P., & McGonigle, B. O. (1977). Serial adaptation to conflicting prismatic rearrangement  
842 effects in monkey and man. *Perception*, 6(1), 15-29. doi:10.1068/p060015
- 843 Foerde, K., & Shohamy, D. (2011). The role of the basal ganglia in learning and memory: Insight  
844 from Parkinson's disease. *Neurobiology of learning and memory*, 96(4), 624-636.  
845 doi:10.1016/j.nlm.2011.08.006
- 846 Galea, J. M., Sami, S. A., Albert, N. B., & Miall, R. C. (2010). Secondary tasks impair adaptation to  
847 step- and gradual-visual displacements. *Exp Brain Res*, 202(2), 473-484. doi:10.1007/s00221-  
848 010-2158-x
- 849 Gallistel, C. R., Fairhurst, S., & Balsam, P. (2004). The learning curve: implications of a quantitative  
850 analysis. *Proc Natl Acad Sci U S A*, 101(36), 13124-13131. doi:10.1073/pnas.0404965101
- 851 Georgopoulos, A. P., & Massey, J. T. (1987). Cognitive Spatial-Motor Processes .1. The Making of  
852 Movements at Various Angles from a Stimulus Direction. *Experimental Brain Research*,  
853 65(2), 361-370.
- 854 Gonzalez Castro, L. N., Hadjiosif, A. M., Hemphill, M. A., & Smith, M. A. (2014). Environmental  
855 consistency determines the rate of motor adaptation. *Curr Biol*, 24(10), 1050-1061.  
856 doi:10.1016/j.cub.2014.03.049
- 857 Hadjiosif, A., & Smith, M. (2013). *Savings is restricted to the temporally labile component of motor*  
858 *adaptation*. Paper presented at the Translational and Computational Motor Control,  
859 Washington DC.
- 860 Haith, A. M., Huberdeau, D. M., & Krakauer, J. W. (2015). The influence of movement preparation  
861 time on the expression of visuomotor learning and savings. *J Neurosci*, 35(13), 5109-5117.  
862 doi:10.1523/JNEUROSCI.3869-14.2015
- 863 Herzfeld, D. J., Vaswani, P. A., Marko, M. K., & Shadmehr, R. (2014). A memory of errors in  
864 sensorimotor learning. *Science*, 345(6202), 1349-1353. doi:10.1126/science.1253138
- 865 Howard, I. S., Ingram, J. N., & Wolpert, D. M. (2009). A modular planar robotic manipulandum with

- 866 end-point torque control. *J Neurosci Methods*, 181(2), 199-211.  
867 doi:10.1016/j.jneumeth.2009.05.005
- 868 Huang, V. S., Haith, A., Mazzoni, P., & Krakauer, J. W. (2011). Rethinking motor learning and  
869 savings in adaptation paradigms: model-free memory for successful actions combines with  
870 internal models. *Neuron*, 70(4), 787-801. doi:10.1016/j.neuron.2011.04.012
- 871 Huberdeau, D. M., Haith, A. M., & Krakauer, J. W. (2015a). Formation of a long-term memory for  
872 visuomotor adaptation following only a few trials of practice. *J Neurophysiol*, 114(2), 969-  
873 977. doi:10.1152/jn.00369.2015
- 874 Huberdeau, D. M., Krakauer, J. W., & Haith, A. M. (2015b). Dual-process decomposition in human  
875 sensorimotor adaptation. *Curr Opin Neurobiol*, 33, 71-77. doi:10.1016/j.conb.2015.03.003
- 876 Huberdeau, D. M., Krakauer, J. W., & Haith, A. M. (2017). Practice induces a qualitative change in  
877 the memory representation for visuomotor learning. *BioRxiv*, 226415.
- 878 Hwang, E. J., Smith, M. A., & Shadmehr, R. (2006). Dissociable effects of the implicit and explicit  
879 memory systems on learning control of reaching. *Exp Brain Res*, 173(3), 425-437.  
880 doi:10.1007/s00221-006-0391-0
- 881 Izawa, J., & Shadmehr, R. (2011). Learning from sensory and reward prediction errors during motor  
882 adaptation. *PLoS Comput Biol*, 7(3), e1002012. doi:10.1371/journal.pcbi.1002012
- 883 Kim, H., Parvin, D., & Ivry, R. (2019). The influence of task outcome on implicit motor learning.  
884 *BioRxiv*, 363606. doi:10.1101/363606
- 885 Kojima, Y., Iwamoto, Y., & Yoshida, K. (2004). Memory of learning facilitates saccadic adaptation in  
886 the monkey. *J Neurosci*, 24(34), 7531-7539. doi:10.1523/JNEUROSCI.1741-04.2004
- 887 Krakauer, J. W., & Carmichael, S. T. (2017). *Broken Movement: The Neurobiology of Motor  
888 Recovery After Stroke*: MIT Press.
- 889 Landi, S. M., Baguear, F., & Della-Maggiore, V. (2011). One Week of Motor Adaptation Induces  
890 Structural Changes in Primary Motor Cortex That Predict Long-Term Memory One Year  
891 Later. *Journal of Neuroscience*, 31(33), 11808-11813. doi:10.1523/Jneurosci.2253-11.2011
- 892 Leech, K. A., & Roemmich, R. T. (2018). Independent voluntary correction and savings in locomotor  
893 learning. *J Exp Biol*, 221(Pt 15). doi:10.1242/jeb.181826
- 894 Leow, L.-A., De Rugy, A., Loftus, A. M., & Hammond, G. (2013). Different mechanisms  
895 contributing to savings and anterograde interference are impaired in Parkinson's. *Frontiers in  
896 Neuroscience*, 108.
- 897 Leow, L.-A., De Rugy, A., Marinovic, W., Riek, S., & Carroll, T. J. (2016). Savings for visuomotor  
898 adaptation require prior history of error, not prior repetition of successful actions. *Journal of  
899 Neurophysiology*, 116(4), 1603-1614.
- 900 Leow, L. A., Gunn, R., Marinovic, W., & Carroll, T. J. (2017). Estimating the implicit component of  
901 visuomotor rotation learning by constraining movement preparation time. *J Neurophysiol*,  
902 118(2), 666-676. doi:10.1152/jn.00834.2016
- 903 Leow, L. A., Loftus, A. M., & Hammond, G. R. (2012). Impaired savings despite intact initial  
904 learning of motor adaptation in Parkinson's disease. *Exp Brain Res*, 218(2), 295-304.  
905 doi:10.1007/s00221-012-3060-5
- 906 Leow, L. A., Marinovic, W., de Rugy, A., & Carroll, T. J. (2018). Task errors contribute to implicit  
907 aftereffects in sensorimotor adaptation. *Eur J Neurosci*, 48(11), 3397-3409.  
908 doi:10.1111/ejn.14213
- 909 Maeda, R. S., McGee, S. E., & Marigold, D. S. (2018). Long-term retention and reconsolidation of a  
910 visuomotor memory. *Neurobiol Learn Mem*, 155, 313-321. doi:10.1016/j.nlm.2018.08.020
- 911 Malone, L. A., & Bastian, A. J. (2010). Thinking About Walking: Effects of Conscious Correction  
912 Versus Distraction on Locomotor Adaptation. *Journal of Neurophysiology*, 103(4), 1954-  
913 1962. doi:10.1152/jn.00832.2009
- 914 Marinelli, L., Crupi, D., Di Rocco, A., Bove, M., Eidelberg, D., Abbruzzese, G., & Ghilardi, M. F.  
915 (2009). Learning and consolidation of visuo-motor adaptation in Parkinson's disease.  
916 *Parkinsonism Relat Disord*, 15(1), 6-11. doi:10.1016/j.parkreldis.2008.02.012
- 917 Mawase, F., Shmuelof, L., Bar-Haim, S., & Karniel, A. (2014). Savings in locomotor adaptation  
918 explained by changes in learning parameters following initial adaptation. *J Neurophysiol*,  
919 111(7), 1444-1454. doi:10.1152/jn.00734.2013
- 920 Mazzoni, P., & Krakauer, J. W. (2006). An implicit plan overrides an explicit strategy during

- 921 visuomotor adaptation. *J Neurosci*, 26(14), 3642-3645. doi:10.1523/JNEUROSCI.5317-  
922 05.2006
- 923 McDougle, S. D., Ivry, R. B., & Taylor, J. A. (2016). Taking Aim at the Cognitive Side of Learning in  
924 Sensorimotor Adaptation Tasks. *Trends in cognitive sciences*, 20(7), 535-544.  
925 doi:10.1016/j.tics.2016.05.002
- 926 McDougle, S. D., & Taylor, J. A. (2019). Dissociable cognitive strategies for sensorimotor learning.  
927 *Nat Commun*, 10(1), 40. doi:10.1038/s41467-018-07941-0
- 928 Morehead, J. R., Qasim, S. E., Crossley, M. J., & Ivry, R. (2015). Savings upon Re-Aiming in  
929 Visuomotor Adaptation. *J Neurosci*, 35(42), 14386-14396. doi:10.1523/JNEUROSCI.1046-  
930 15.2015
- 931 Nikooyan, A. A., & Ahmed, A. A. (2015). Reward feedback accelerates motor learning. *J*  
932 *Neurophysiol*, 113(2), 633-646. doi:10.1152/jn.00032.2014
- 933 Orban de Xivry, J. J., & Lefevre, P. (2015). Formation of model-free motor memories during motor  
934 adaptation depends on perturbation schedule. *J Neurophysiol*, 113(7), 2733-2741.  
935 doi:10.1152/jn.00673.2014
- 936 Palidis, D. J., Cashaback, J., & Gribble, P. J. b. (2018). Neural Signatures of Reward and Sensory  
937 Prediction Error in Motor Learning. 262576.
- 938 Pellizzer, G., & Georgopoulos, A. P. (1993). Common processing constraints for visuomotor and  
939 visual mental rotations. *Exp Brain Res*, 93(1), 165-172.
- 940 Provost, A., Johnson, B., Karayanidis, F., Brown, S. D., & Heathcote, A. (2013). Two routes to  
941 expertise in mental rotation. *Cogn Sci*, 37(7), 1321-1342. doi:10.1111/cogs.12042
- 942 Reichenthal, M., Avraham, G., Karniel, A., & Shmuelof, L. (2016). Target size matters: target errors  
943 contribute to the generalization of implicit visuomotor learning. *J Neurophysiol*, 116(2), 411-  
944 424. doi:10.1152/jn.00830.2015
- 945 Reuter, E. M., Pearcey, G. E. P., & Carroll, T. J. (2018). Greater neural responses to trajectory errors  
946 are associated with superior force field adaptation in older adults. *Exp Gerontol*, 110, 105-  
947 117. doi:10.1016/j.exger.2018.05.020
- 948 Roemmich, R. T., & Bastian, A. J. (2015). Two ways to save a newly learned motor pattern. *J*  
949 *Neurophysiol*, 113(10), 3519-3530. doi:10.1152/jn.00965.2014
- 950 Sack, A. T., Lindner, M., & Linden, D. E. J. (2007). Object- and direction-specific interference  
951 between manual and mental rotation. *Perception & Psychophysics*, 69(8), 1435-1449. doi:Doi  
952 10.3758/Bf03192958
- 953 Savoie, F. A., Thenault, F., Whittingstall, K., & Bernier, P. M. (2018). Visuomotor Prediction Errors  
954 Modulate EEG Activity Over Parietal Cortex. *Sci Rep*, 8(1), 12513. doi:10.1038/s41598-018-  
955 30609-0
- 956 Schaefer, S. Y., Shelly, I. L., & Thoroughman, K. A. (2012). Beside the point: motor adaptation  
957 without feedback-based error correction in task-irrelevant conditions. *J Neurophysiol*, 107(4),  
958 1247-1256. doi:10.1152/jn.00273.2011
- 959 Schouten, J. F., & Bekker, J. A. (1967). Reaction time and accuracy. *Acta Psychol (Amst)*, 27, 143-  
960 153. doi:[http://dx.doi.org/10.1016/0001-6918\(67\)90054-6](http://dx.doi.org/10.1016/0001-6918(67)90054-6)
- 961 Schween, R., Taube, W., Gollhofer, A., & Leukel, C. (2014). Online and post-trial feedback  
962 differentially affect implicit adaptation to a visuomotor rotation. *Exp Brain Res*, 232(9), 3007-  
963 3013. doi:10.1007/s00221-014-3992-z
- 964 Seidler, R. D., Gluskin, B. S., & Greeley, B. (2017). Right prefrontal cortex transcranial direct current  
965 stimulation enhances multi-day savings in sensorimotor adaptation. *J Neurophysiol*, 117(1),  
966 429-435. doi:10.1152/jn.00563.2016
- 967 Shadmehr, R., & Mussa-Ivaldi, F. A. (1994). Adaptive representation of dynamics during learning of  
968 a motor task. *J Neurosci*, 14(5 Pt 2), 3208-3224.
- 969 Sheahan, H. R., Ingram, J. N., Zalalylte, G. M., & Wolpert, D. M. (2018). Imagery of movements  
970 immediately following performance allows learning of motor skills that interfere. *Scientific*  
971 *Reports*, 8, 299594. doi:ARTN 14330  
972 10.1038/s41598-018-32606-9
- 973 Shohamy, D., Myers, C. E., Gekhman, K. D., Sage, J., & Gluck, M. A. (2006). L-dopa impairs  
974 learning, but spares generalization, in Parkinson's disease. *Neuropsychologia*, 44(5), 774-784.  
975 doi:10.1016/j.neuropsychologia.2005.07.013

- 976 Smith, M. A., Ghazizadeh, A., & Shadmehr, R. (2006). Interacting adaptive processes with different  
977 timescales underlie short-term motor learning. *PLoS Biol*, 4(6), e179.  
978 doi:10.1371/journal.pbio.0040179
- 979 Song, J. H., & Bedard, P. (2015). Paradoxical benefits of dual-task contexts for visuomotor memory.  
980 *Psychol Sci*, 26(2), 148-158. doi:10.1177/0956797614557868
- 981 Taylor, J. A., & Ivry, R. B. (2011). Flexible cognitive strategies during motor learning. *PLoS Comput*  
982 *Biol*, 7(3), e1001096. doi:10.1371/journal.pcbi.1001096
- 983 Taylor, J. A., & Thoroughman, K. A. (2007). Divided attention impairs human motor adaptation but  
984 not feedback control. *J Neurophysiol*, 98(1), 317-326. doi:10.1152/jn.01070.2006
- 985 Taylor, J. A., & Thoroughman, K. A. (2008). Motor adaptation scaled by the difficulty of a secondary  
986 cognitive task. *PLOS One*, 3(6), e2485. doi:10.1371/journal.pone.0002485
- 987 Therrien, A. S., Wolpert, D. M., & Bastian, A. J. (2016). Effective reinforcement learning following  
988 cerebellar damage requires a balance between exploration and motor noise. *Brain*, 139(Pt 1),  
989 101-114. doi:10.1093/brain/awv329
- 990 Torrecillos, F., Albouy, P., Brochier, T., & Malfait, N. J. J. o. N. (2014). Does the processing of  
991 sensory and reward-prediction errors involve common neural resources? Evidence from a  
992 frontocentral negative potential modulated by movement execution errors. 34(14), 4845-4856.
- 993 Uhlarik, J. J. (1973). Role of cognitive factors on adaptation to prismatic displacement. *J Exp Psychol*,  
994 98(2), 223-232. doi:10.1037/h0034364
- 995 Vo, A., Hiebert, N. M., Seergobin, K. N., Solcz, S., Partridge, A., & MacDonald, P. A. J. F. i. h. n.  
996 (2014). Dopaminergic medication impairs feedback-based stimulus-response learning but not  
997 response selection in Parkinson's disease. 8, 784.
- 998 von Helmholtz, H., & Southall, J. P. (1924). Helmholtz's treatise on physiological optics, Vol. 1,  
999 Trans.
- 1000 Vyas, S., Even-Chen, N., Stavisky, S. D., Ryu, S. I., Nuyujukian, P., & Shenoy, K. V. (2018). Neural  
1001 Population Dynamics Underlying Motor Learning Transfer. *Neuron*, 97(5), 1177-1186 e1173.  
1002 doi:10.1016/j.neuron.2018.01.040
- 1003 Welch, R. B. (1969). Adaptation to prism-displaced vision: The importance of target-pointing.  
1004 *Perception & Psychophysics*, 5(5), 305-309. doi:10.3758/bf03209569
- 1005 Wright, R., Thompson, W. L., Ganis, G., Newcombe, N. S., & Kosslyn, S. M. (2008). Training  
1006 generalized spatial skills. *Psychon Bull Rev*, 15(4), 763-771.
- 1007 Yin, C., & Wei, K. (2014). Interference from mere thinking: mental rehearsal temporarily disrupts  
1008 recall of motor memory. *J Neurophysiol*, 112(3), 594-602. doi:10.1152/jn.00070.2014
- 1009 Zarahn, E., Weston, G. D., Liang, J., Mazzoni, P., & Krakauer, J. W. (2008). Explaining savings for  
1010 visuomotor adaptation: linear time-invariant state-space models are not sufficient. *J*  
1011 *Neurophysiol*, 100(5), 2537-2548. doi:10.1152/jn.90529.2008
- 1012
